# Supplementary material for: Production of Structurally Defined Chito-Oligosaccharides with a Single N-Acetylation at Their Reducing End Using a Newly Discovered Chitinase from Paenibacillus pabuli
Source: PubMed Central journal article supplement (PMC8041281; doi:10.1021/acs.jafc.0c06804), 2021-03-10
Supplement: jf0c06804_si_001.pdf [file jf0c06804_si_001.pdf]

---

# Supporting Information

## Production of structurally defined chito-oligosaccharides with a single *N*-acetylation at their reducing end using a newly discovered chitinase from *Paenibacillus pabuli*

Jing Li<sup>a,b,c</sup>, Damao Wang<sup>b,d</sup>, Shu-Chieh Chang<sup>b</sup>, Pi-Hui Liang<sup>e</sup>, Vaibhav Srivastava<sup>b</sup>, Shih-Yun Guu<sup>f</sup>, Jiun-Jie Shie<sup>g</sup>, Kay-Hooi Khoo<sup>f</sup>, Vincent Bulone<sup>b,h</sup>, Yves S. Y. Hsieh<sup>\*b,c,i</sup>

<sup>a</sup>College of Life Sciences, Shanghai Normal University, Shanghai 220234, PR China

<sup>b</sup>Division of Glycoscience, Department of Chemistry, School of Engineering Sciences in Chemistry, Biotechnology and Health, Royal Institute of Technology (KTH), AlbaNova University Center, Stockholm, SE10691, Sweden

<sup>c</sup>School of Pharmacy, College of Pharmacy, Taipei Medical University, 250 Wuxing Street, Taipei 11031, Taiwan

<sup>d</sup>College of Food Science, Southwest University, Chongqing, 400715, PR China

<sup>e</sup>School of Pharmacy, College of Medicine, National Taiwan University, Taipei 100, Taiwan

<sup>f</sup>Institute of Biological Chemistry, Academia Sinica, 128 Academia Road Sec. 2, Nankang, Taipei 115, Taiwan

<sup>g</sup>Institute of Chemistry, Academia Sinica, 128 Academia Road Sec. 2, Nankang, Taipei 115, Taiwan

<sup>h</sup>School of Agriculture, Food and Wine, The University of Adelaide, Urrbrae 5064, Australia

<sup>i</sup>Genomics Research Center, Academia Sinica, 128 Academia Road Sec. 2, Nankang, Taipei 115, Taiwan





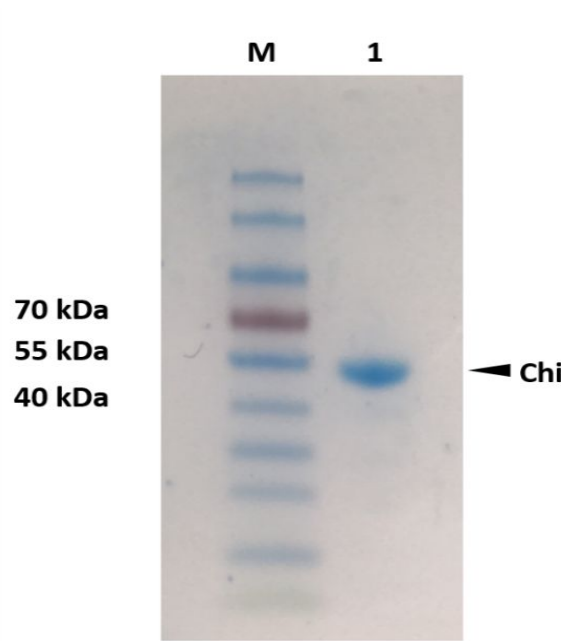

**Figure S5:** SDS-PAGE analysis of the purified recombinant *PpChi* protein: Lane M, protein markers; Lane 1, purified *PpChi* protein using a Ni-NTA column.

**Protein sequence coverage: 79%**

GSAPLPK**KIIAYVAGWANWTANDIKAEQLSHINYSFALISNGK**ATITNSDRTKLQLMV  
 GLKSRNPDLK**VILSVGGWGANGFSDAALTDASRTTFADSIVQLVTSNNLDGVDLDWE**  
 YPTNPAAGTTAR**PQDKQNFTQLLSKVREKLNAQGMNGKQYLLTIAAGASSSYLNGV**  
 EINNITPLLDWINLMTYDFHGTWDATTGHHTNLSGRDISVTS**AVNLFNRNSGVPANKLV**  
 IGGAFYGRAWTGVQNSNGLDRPGSGGFEPDYNTIVSQYLNKNGYTRYWDSSAQAP  
 YLFNGNTFISYDDPQSLSLKVQYVKNSNLGGIMFWEYSNDRSGALLQAVYSEVTGGG  
 TVQPPNPSGYNLVAQANQQIVSAENQGNDQLVANRTTAGDWELFEWITNSDGTVSL  
 KSKINNK**YVTADVNVGGALIAKATTIQWEKFNRVDLGDGTIALQALANNLYVTCDL**  
 NNGGKLVASRNSVGGAW**EAFRVNKLE**

**Figure S6:** Peptides identified by mass spectrometric analysis of the recombinant *PpChi* protein (red).

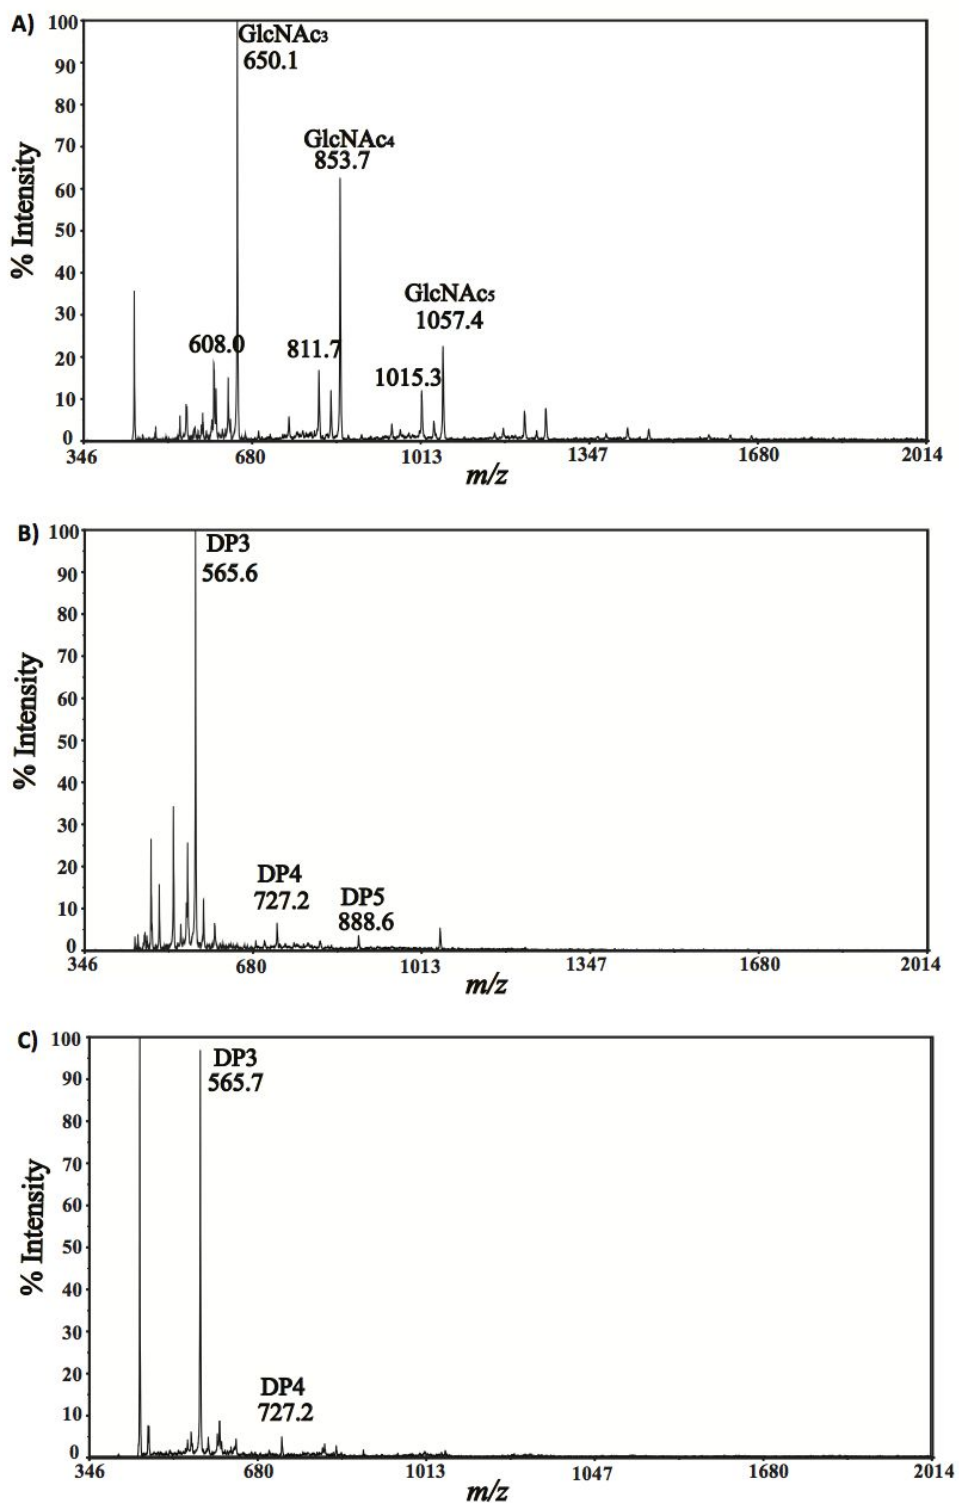

**Figure S7:** Mass spectra of: A) products released by *TvChi* incubated for 1 h in the presence of chitosan with a da of 48%; and B) and C), products released by *PpChi* after 1-h treatment with chitin (90% da) and chitosan (10% da), respectively

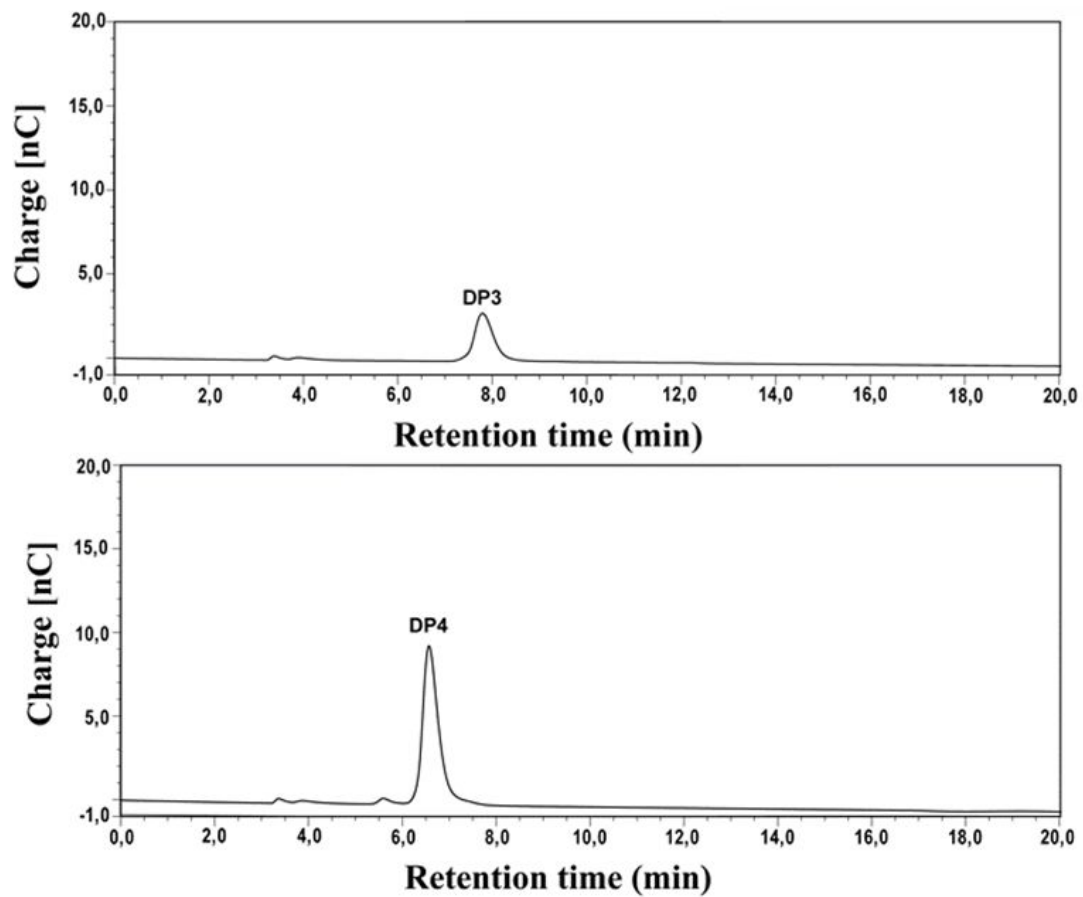

**Figure S8:** HPAEC-PAD chromatogram of purified DP3 (DDA) and DP4 (DDDA).

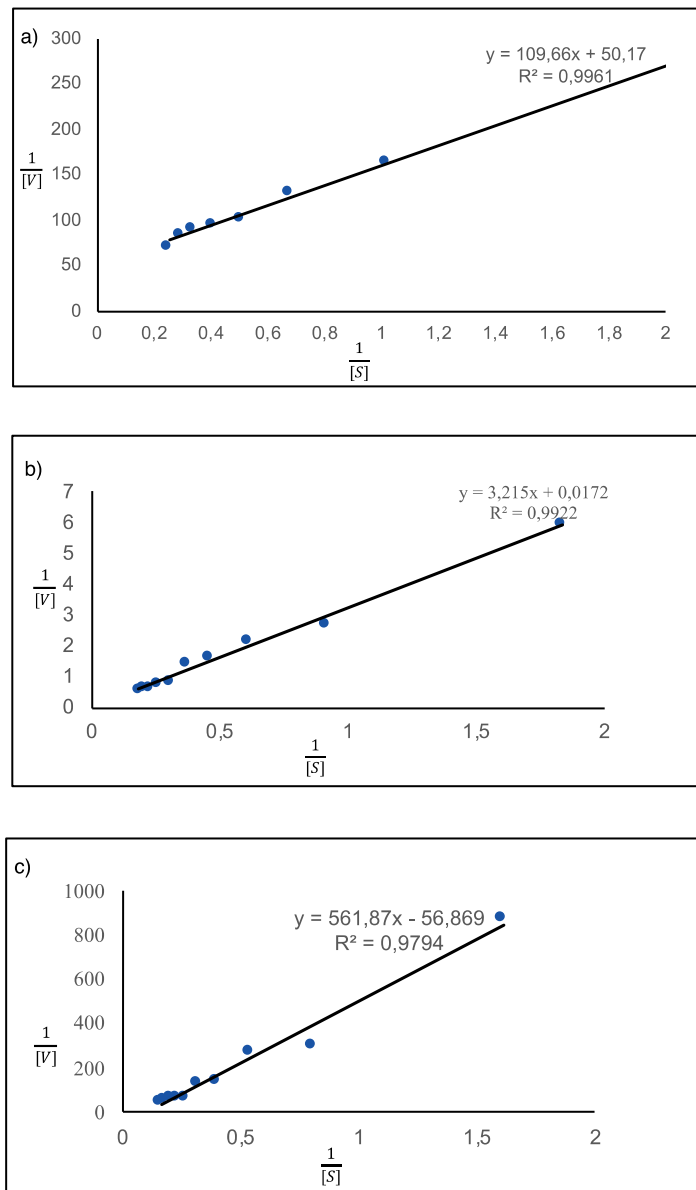

**Figure S9:** Lineweaver–Burk plots of PpChi in the presence of chitin with a da of A) 90%, B) 48%, and C) 10%.

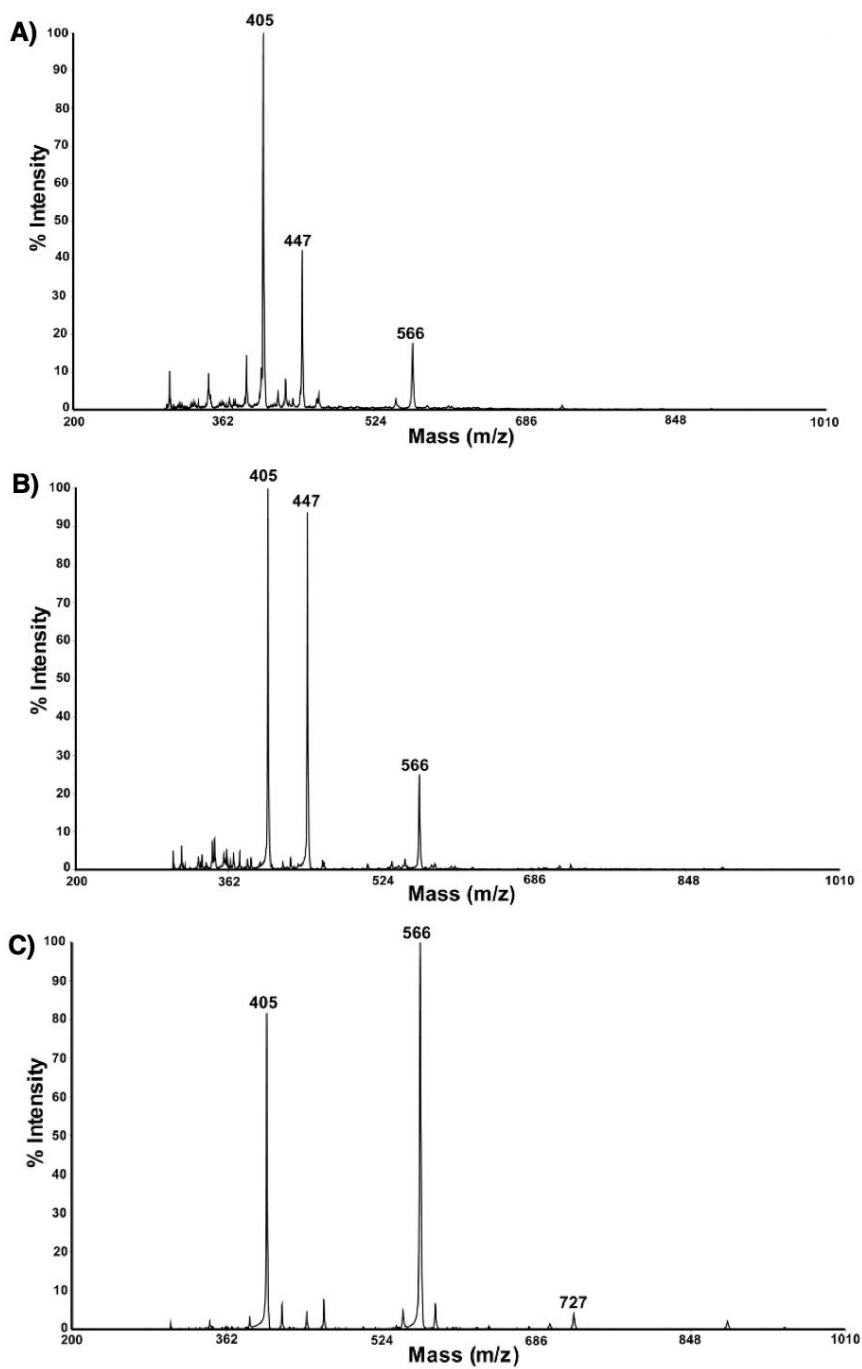

**Figure S10:** Mass spectra of products released by *PpChi* after 48h incubation in the presence of chitin with a da of A) 90%, B) 48%, and C) 10%. Sodiated molecular ion  $[M+Na]^+$  of GlcNGlcNAc  $m/z = 405$ ; GlcNAcGlcNAc  $m/z = 447$ ; Glc<sub>2</sub>GlcNAc  $m/z = 566$ ; Glc<sub>3</sub>GlcNAc  $m/z = 727$ .



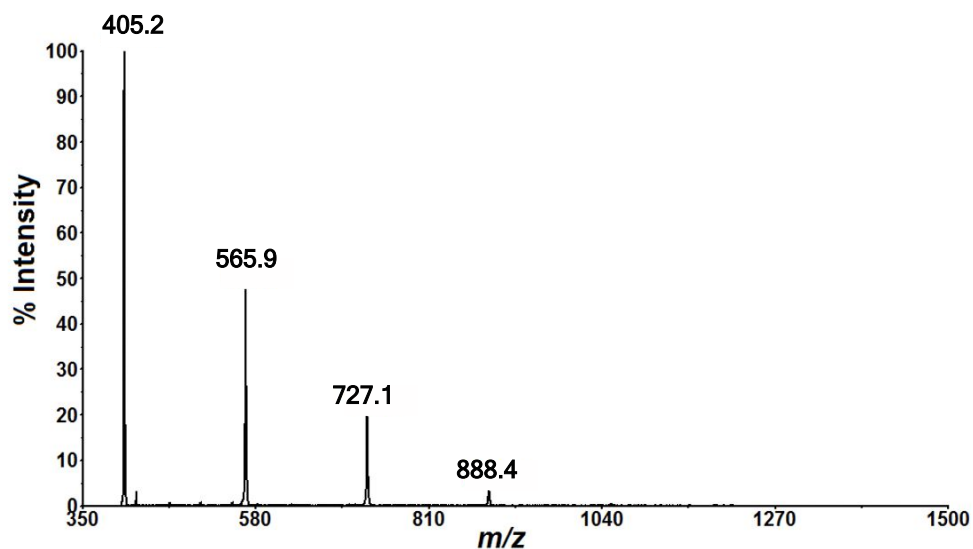

**Figure S11:** Mass spectrum of chito-oligosaccharide products released by *PpChi* after 24 h treatment of the lobster shell preparation pretreated with *FfAA11*.

**Table S1** Gradients and eluents of HPAEC-PAD (Dionex, Sunnyvale, CA)

Column: PA 200  
 Flow rate: 0.5ml/min  
 Injection volumn: 10 uL  
 Column temperature: 30 °C

| Retention time (min) | 300mM NaOH | 1 M NaOAc | H <sub>2</sub> O |
|----------------------|------------|-----------|------------------|
| 0                    | 7%         | 0%        | 93%              |
| 25                   | 7%         | 0%        | 93%              |
| 30                   | 7%         | 50%       | 43%              |

**Table S2** Hydrolysis of lobster shell samples in different conditions

| Time (h) | Reducing sugar (μM)         |                                              |                                                      |
|----------|-----------------------------|----------------------------------------------|------------------------------------------------------|
|          | Lobster shell+ <i>PpChi</i> | Lobster shell + <i>FfAA11</i> + <i>PpChi</i> | <i>FfAA11</i> pretreated lobster shell+ <i>PpChi</i> |
| 2        | 1.00±0.17                   | 1.14±0.09                                    | 6.19±1.59                                            |
| 4        | 2.88±0.45                   | 4.51±0.84                                    | 18.24±3.80                                           |
| 8        | 7.85±0.91                   | 10.41±2.07                                   | 43.01±8.25                                           |
| 24       | 9.39±1.18                   | 17.07±3.94                                   | 63.85±7.48                                           |
| 48       | 16.38±2.30                  | 24.40±4.87                                   | 104.68±13.59                                         |
| 72       | 17.79±3.51                  | 24.10±4.16                                   | 110.24±10.96                                         |
